# Supplementary material
Source: PubMed Central journal article supplement (PMC6013055)
Supplement: NIHMS974483-supplement-1.pdf [file NIHMS974483-supplement-1.pdf]

**Appendix A2: Patient Level Characteristics**

| Patient Characteristics                                                                 | Number of patients in cohort<br>(n = 453,050) |            |
|-----------------------------------------------------------------------------------------|-----------------------------------------------|------------|
|                                                                                         | Count                                         | Percentage |
| Gender                                                                                  |                                               |            |
| Male                                                                                    | 208,111                                       | 45%        |
| Female                                                                                  | 244,939                                       | 54.1%      |
| Ethnicity                                                                               |                                               |            |
| White                                                                                   | 256,081                                       | 56.5%      |
| Hispanic                                                                                | 93,184                                        | 20.6%      |
| African American                                                                        | 49,876                                        | 11.0%      |
| Asian Pacific Islander (API)                                                            | 46,920                                        | 10.4%      |
| Asian                                                                                   | 1,281                                         | 0.3%       |
| Report of Multiple Ethnicities                                                          | 3,540                                         | 0.8%       |
| Missing                                                                                 | 2,168                                         | 0.5%       |
| Percent of patients with more than one hospitalization episode during the cohort period | 140,025                                       | 30.9%      |
