# Supplementary material
Source: PubMed Central journal article supplement (PMC6013055)
Supplement: NIHMS974483-supplement-2.pdf [file NIHMS974483-supplement-2.pdf]

**Appendix A3.** Model output with coefficients

| Fixed coefficients         |           | Model Output |           |        |                    |  |
|----------------------------|-----------|--------------|-----------|--------|--------------------|--|
|                            | coef      | exp(coef)    | se(coef)  | z      | p                  |  |
| AGE_AT_ADMIT               | 0.012843  | 1.0129       | 0.0018665 | 6.88   | 0.0000000000059000 |  |
| Female                     | -0.262365 | 0.7692       | 0.0500482 | -5.24  | 0.0000001600000000 |  |
| ADMIT_CAT1 ED, SURGICAL    | 0.071219  | 1.0738       | 0.0928874 | 0.77   | 0.4400000000000000 |  |
| ADMIT_CAT3 ED, MEDICAL     | -0.480057 | 0.6187       | 0.0923697 | -5.20  | 0.0000002000000000 |  |
| ADMIT_CAT4 NON-ED, MEDICAL | -0.124018 | 0.8834       | 0.1122244 | -1.11  | 0.2700000000000000 |  |
| FULL_CODE                  | -0.111877 | 0.8942       | 0.0709375 | -1.58  | 0.1100000000000000 |  |
| HX_DIABETES_FLAG           | 0.082231  | 1.0857       | 0.0520687 | 1.58   | 0.1100000000000000 |  |
| HX_STROKE_FLAG             | 0.030495  | 1.0310       | 0.0682219 | 0.45   | 0.6500000000000000 |  |
| COPS2_PRIOR                | 0.001552  | 1.0016       | 0.0004447 | 3.49   | 0.0004800000000000 |  |
| LAPS2_HET                  | 0.005164  | 1.0052       | 0.0006553 | 7.88   | 0.0000000000000033 |  |
| BRADEN_TOTAL               | -0.114619 | 0.8917       | 0.0083270 | -13.76 | 0.0000000000000000 |  |
| Random effects             |           |              |           |        |                    |  |
| Group                      | Variable  | Std Dev      | Variance  |        |                    |  |
| START_FAC                  | Intercept | 0.7096       | 0.5035    |        |                    |  |

**Note:** For continuous variables, model coefficients were multiplied by the difference between the 25th percentile/first quartile(Q1) score and the 75th percentile/3rd quartile (Q3) score. Therefore, hazard ratio results reflect the impact of a continuous variable on the increased rate of HAPI over time when changed from Q1 (25th percentile) to Q3 (75th percentile).
